# Supplementary material for: Genome-wide autosomal, mtDNA, and Y chromosome analysis of King Bela III of the Hungarian Arpad dynasty
Source: Springer Nature journal article supplement (doi:10.1038/s41598-021-98796-x), 2021-09-28
Supplement: 41598_2021_98796_MOESM1_ESM.pdf [file 41598_2021_98796_MOESM1_ESM.pdf]

**Genome-wide autosomal, mtDNA, and Y chromosome analysis of King Bela  
III of the Hungarian Arpad dynasty**

Chuan-Chao Wang, Cosimo Posth, Anja Furtwängler, Katalin Sümegi, Zsolt Bánfai, Miklós Kásler,  
Johannes Krause, Béla Melegh

**Supplementary Material**

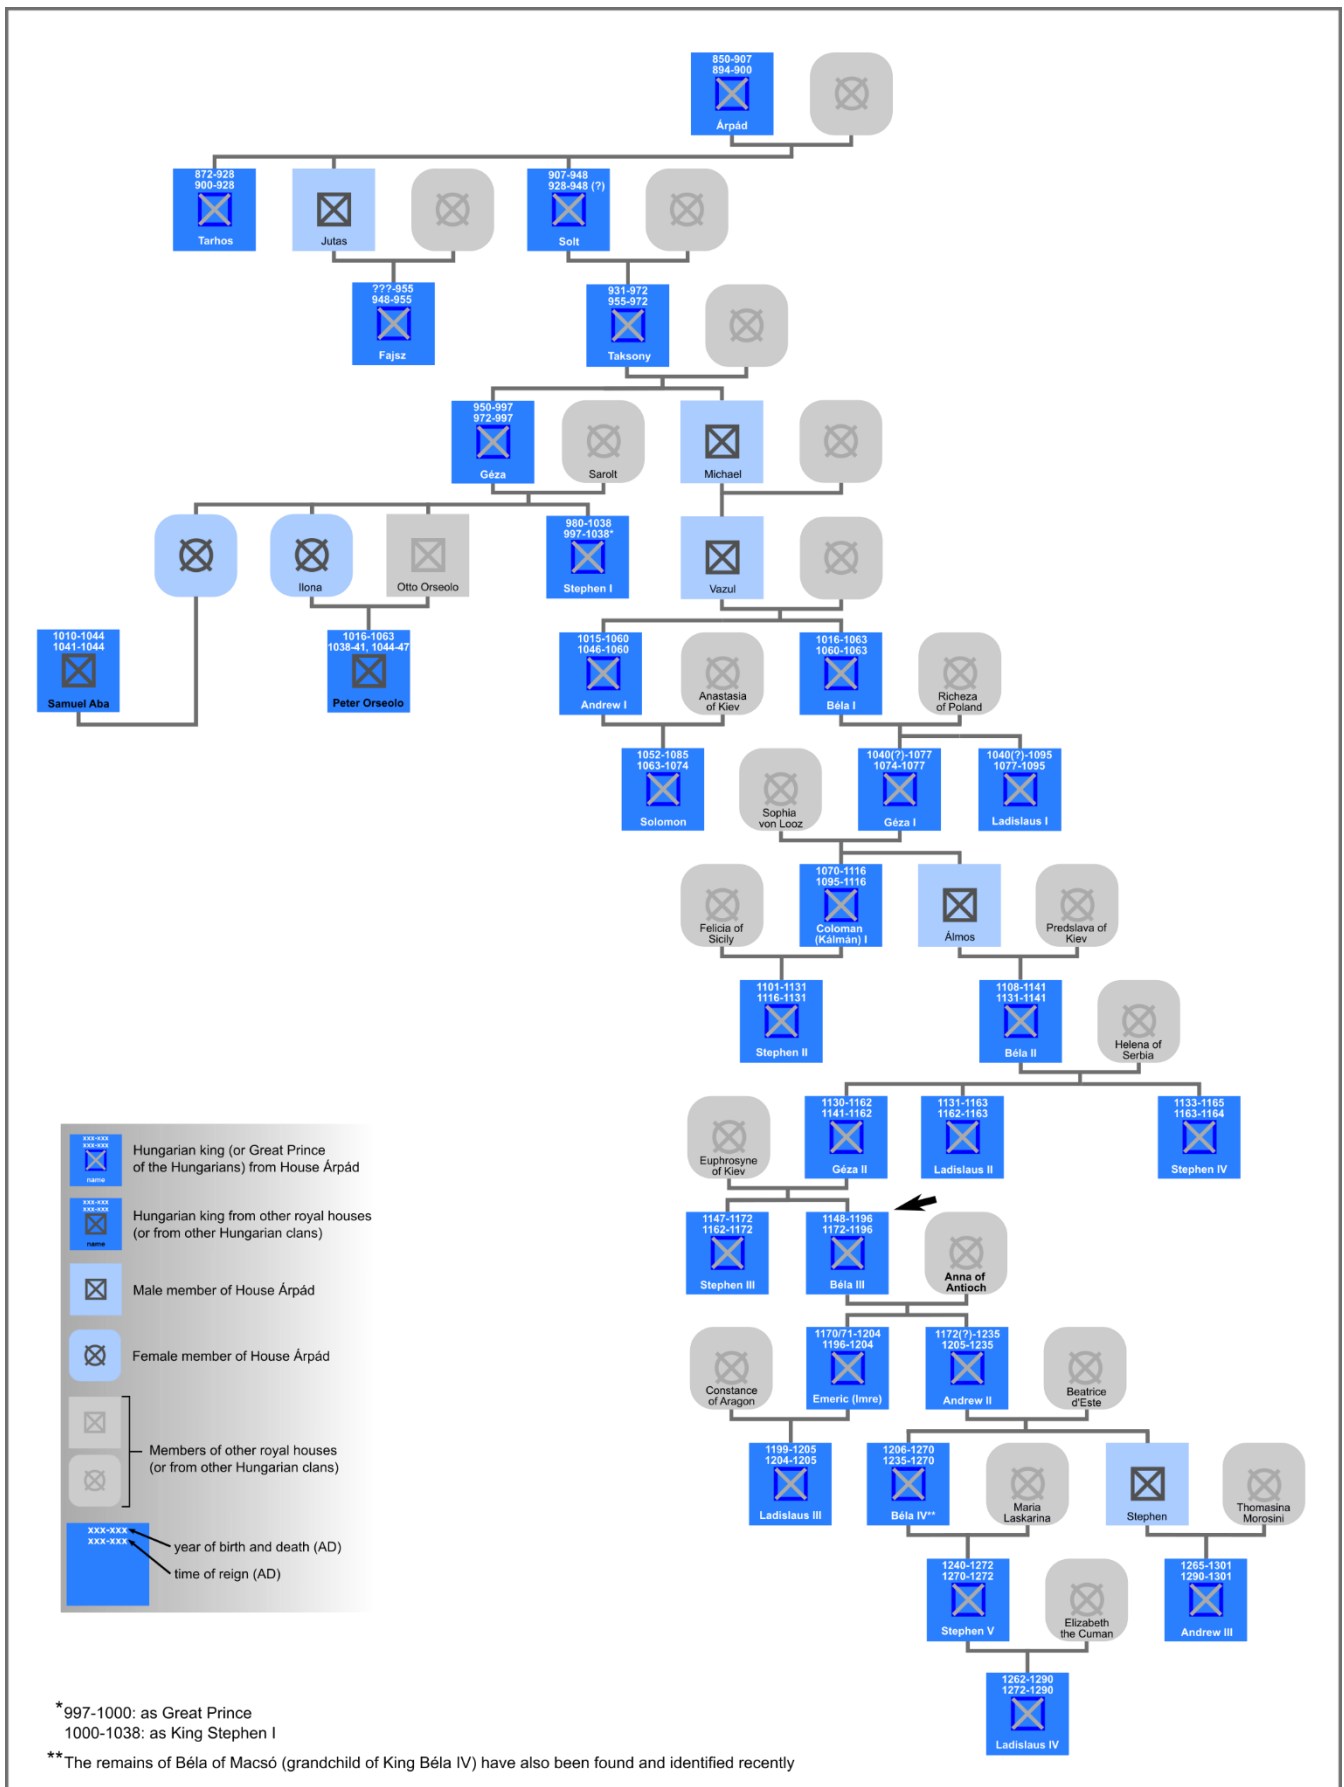

**Figure S1. Reconstructed genealogy of the Árpád dynasty based on written evidences.** King Bela III placement along the male lineage is indicated with an arrow. Based on: Glatz, F. A magyarok krónikája. [The Chronicle of the Hungarians] (Helikon, Pécs, 2006). ISBN: 963-227-070-3.

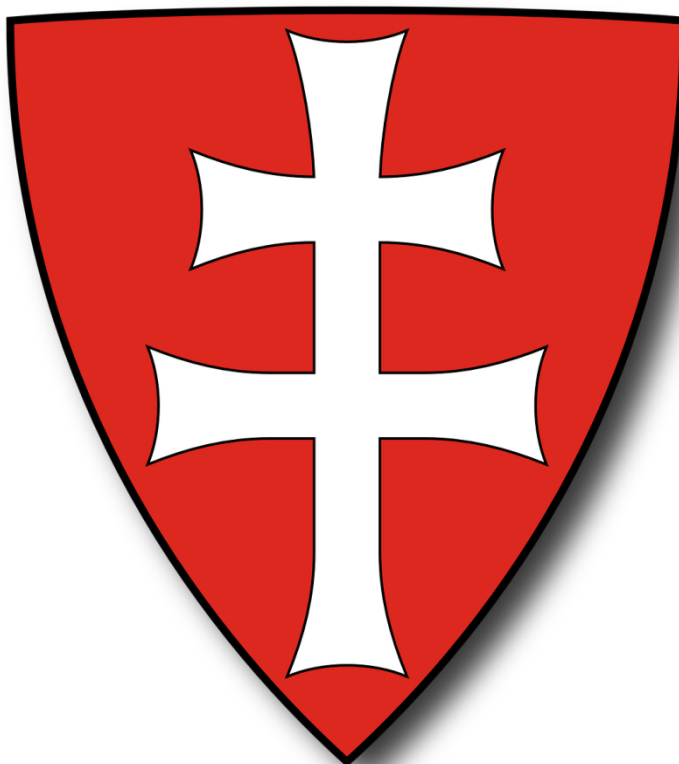

**Figure S2.** The “double-cross” as the symbol of the supreme was introduced by **King Béla III**. It has been put on coat of arms by his grandson King Béla IV, thus the silver “double-cross” in the red field the became a heraldic symbol. Image credits: public domain, CC0.

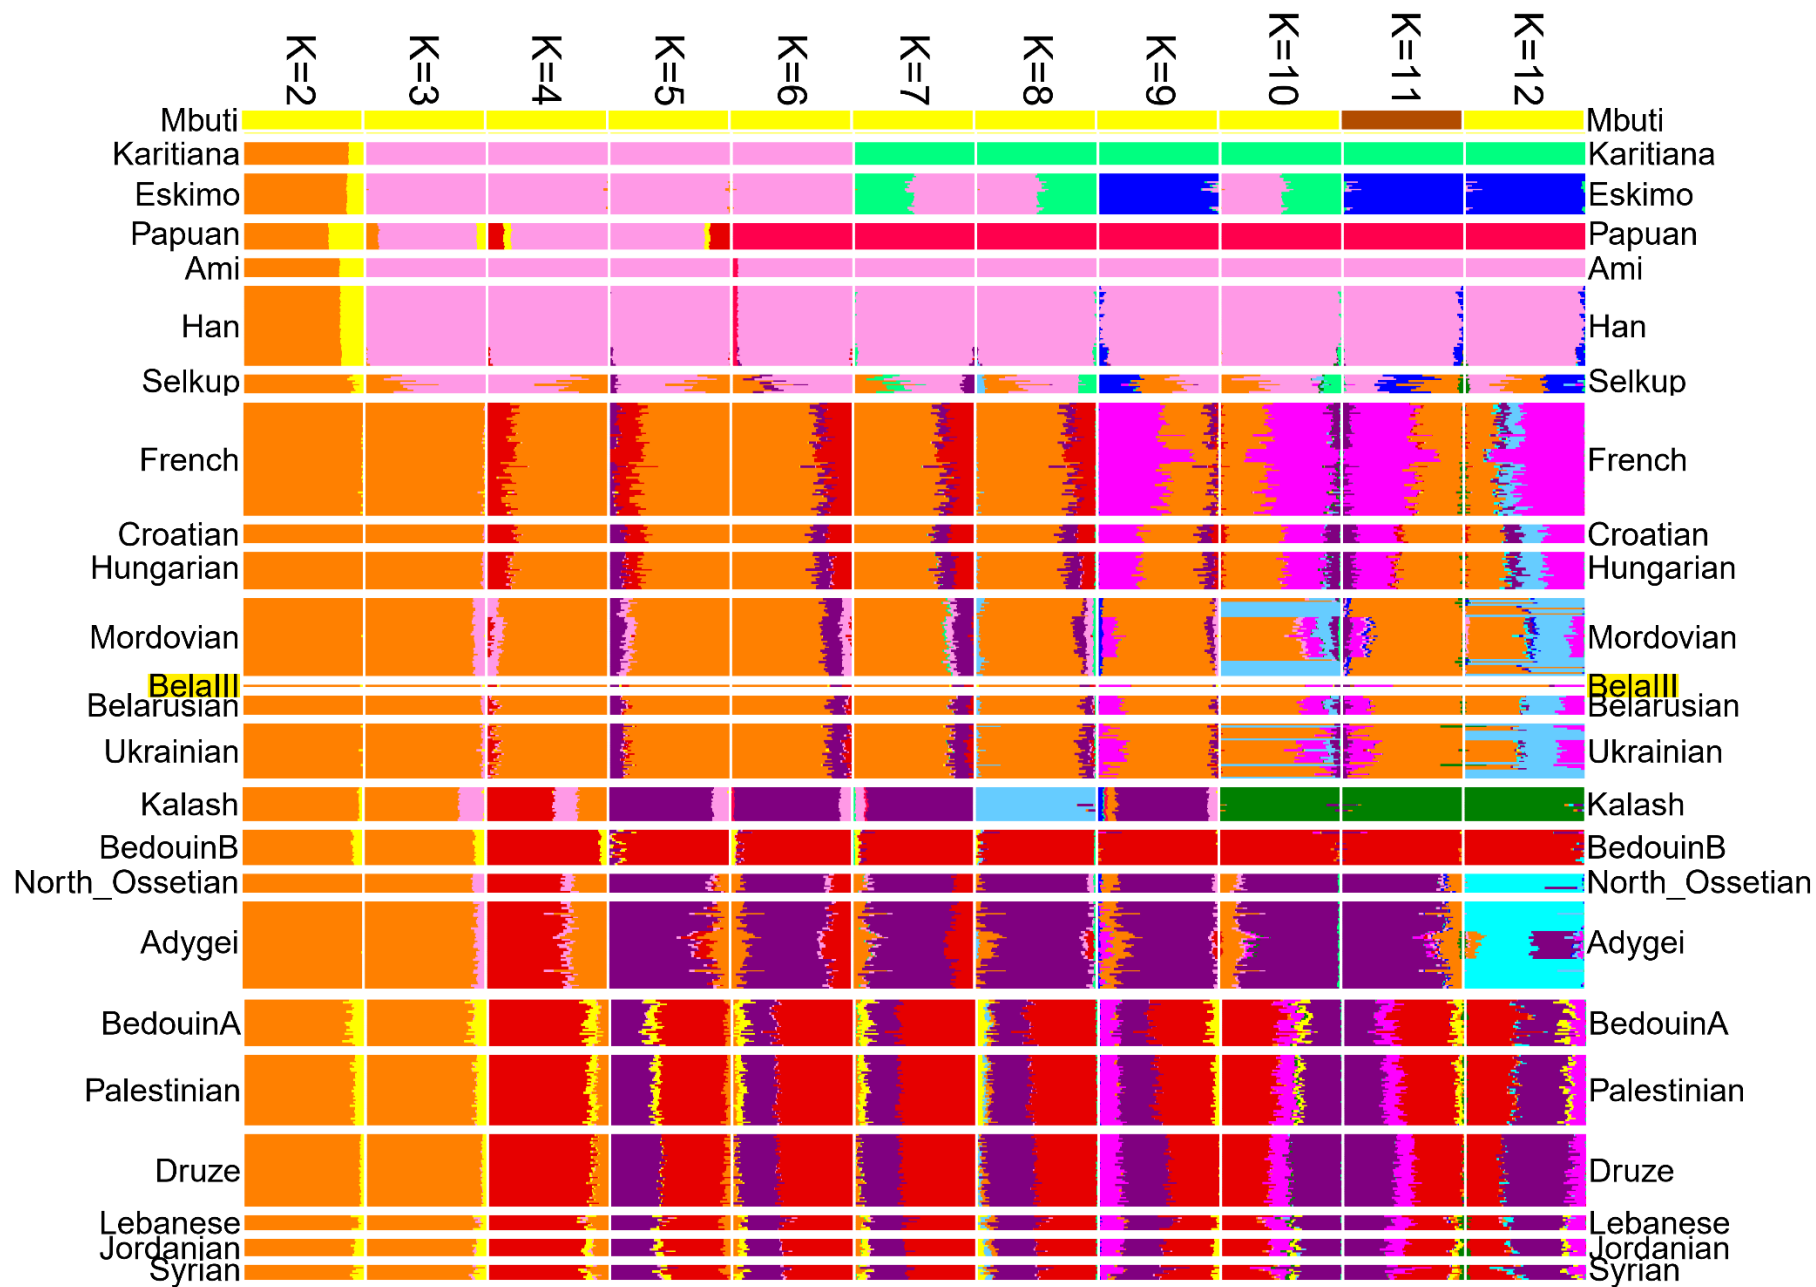

**Figure S3. ADMIXTURE analyses reported applying K=2 to K=12 hypothetical ancestral groups.**

**Table S1. Extraction and library names**

| Lab ID | Extract | Shotung<br>(ds_noUDG) | mtDNA captured<br>(ds_noUDG) | 390K captured<br>(ds_noUDG) | 1240K captured<br>(ss_halfUDG) |
|--------|---------|-----------------------|------------------------------|-----------------------------|--------------------------------|
| JK2069 | MX27    | MA30s                 | -                            | -                           | -                              |
| JK2070 | MX28    | MA31s                 | -                            | -                           | -                              |
| JK2071 | MX29    | MA32s                 | MA32m                        | MA32snp                     | MA172snp                       |
| JK2072 | MX30    | MA33s                 | MA33m                        | MA33snp                     | MA173snp                       |

**Table S2. Shotgun, mtDNA capture and nuclear capture summary statistics.**

## Shotgun

| Sample Name | # of Raw Reads prior Clip & Merge (C&M) | # reads after C&M prior mapping | Mapped Reads after RMDup | Cluster Factor | Endogenous DNA (%) | # of reads on mitochondrium | MT/NUC Ratio | DMG 1st Base 3' | DMG 1st Base 5' | Average fragment length |
|-------------|-----------------------------------------|---------------------------------|--------------------------|----------------|--------------------|-----------------------------|--------------|-----------------|-----------------|-------------------------|
| MA30s       | 4497148                                 | 2459777                         | 27839                    | 1.005          | 1.673              | 17                          | 84.41        | 0.1613          | 0.1625          | 71.52                   |
| MA31s       | 4079186                                 | 2029951                         | 30813                    | 1.005          | 1.907              | 283                         | 1717.13      | 0.1122          | 0.1093          | 69.16                   |
| MA32s       | 3943628                                 | 2060190                         | 137712                   | 1.005          | 9.002              | 104                         | 146.91       | 0.1382          | 0.1415          | 74.49                   |
| MA33s       | 3932648                                 | 2033203                         | 119898                   | 1.006          | 7.683              | 82                          | 116.91       | 0.1118          | 0.1141          | 80.72                   |

## mtDNA capture

| Sample Name | # of Raw Reads prior Clip & Merge (C&M) | # reads after C&M prior mapping | # of Merged Reads | Mapped Reads after RMDup | Cluster Factor | Endogenous DNA (%) | Mean Coverage | Coverage $\geq 1X$ in % | DMG 1st Base 3' | DMG 1st Base 5' | Average fragment length |
|-------------|-----------------------------------------|---------------------------------|-------------------|--------------------------|----------------|--------------------|---------------|-------------------------|-----------------|-----------------|-------------------------|
| MA32m       | 949420                                  | 482101                          | 460694            | 64593                    | 1.297          | 18.189             | 351.61        | 100                     | 0.156           | 0.1606          | 90.19                   |
| MA33m       | 901614                                  | 458488                          | 434503            | 52698                    | 1.209          | 14.662             | 316.5832      | 100                     | 0.1169          | 0.1235          | 99.54                   |

## Nuclear capture

| Library ID | Sample  | Library protocol | # of Raw Reads prior Clip & Merge (C&M) | # reads after C&M prior mapping | Mapped Reads after RMDup | Cluster Factor | Endogenous DNA (%) | DMG 1st Base 3' | DMG 1st Base 5' | Average fragment length |
|------------|---------|------------------|-----------------------------------------|---------------------------------|--------------------------|----------------|--------------------|-----------------|-----------------|-------------------------|
| MA172      | BelaIII | ss_halfUDG       | 35468548                                | 35468548                        | 6666586                  | 2.172          | 40.824             | 0.0559          | 0.0768          | 55.9                    |
| MA173      | BelaIII | ss_halfUDG       | 30870712                                | 30870712                        | 5543457                  | 2.069          | 37.159             | 0.0502          | 0.0586          | 62.79                   |
| MA32       | BelaIII | ds_noUDG         | 27505036                                | 27505036                        | 3999450                  | 1.06           | 15.409             | 0.1199          | 0.1362          | 73.3                    |
| MA33       | BelaIII | ds_noUDG         | 35678385                                | 35678385                        | 4656410                  | 1.066          | 13.912             | 0.0897          | 0.1002          | 80.06                   |

**Table S3. genetic sex determination.**

| Sample  | Y-rate   | X-rate   | sex  |
|---------|----------|----------|------|
| BelaIII | 0.524564 | 0.426962 | Male |

**Table S4. X-chromosome contamination estimate for each library.**

| Library | Number of SNPs | Methods | version | MoM      | SE(MoM)  | ML       | SE(ML)   |
|---------|----------------|---------|---------|----------|----------|----------|----------|
| MA172   | 4251           | Method1 | old_llh | 0.021765 | 2.53E-03 | 0.027055 | 0.00E+00 |
|         |                | Method1 | new_llh | 0.021706 | 2.53E-03 | 0.026995 | 1.11E-13 |
|         |                | Method2 | old_llh | 0.022315 | 4.16E-03 | 0.023601 | 9.02E-14 |
|         |                | Method2 | new_llh | 0.022255 | 4.16E-03 | 0.023561 | 9.32E-14 |
| MA173   | 4101           | Method1 | old_llh | 0.017561 | 2.30E-03 | 0.021908 | 3.15E-14 |
|         |                | Method1 | new_llh | 0.017519 | 2.31E-03 | 0.021865 | 9.22E-14 |
|         |                | Method2 | old_llh | 0.012945 | 3.45E-03 | 0.013916 | 6.31E-14 |
|         |                | Method2 | new_llh | 0.012915 | 3.46E-03 | 0.013896 | 4.32E-14 |
| MA32    | 2561           | Method1 | old_llh | 0.01291  | 3.14E-03 | 0.015401 | 5.14E-14 |
|         |                | Method1 | new_llh | 0.012851 | 3.16E-03 | 0.015355 | 1.31E-14 |
|         |                | Method2 | old_llh | 0.010714 | 4.69E-03 | 0.011181 | 3.67E-14 |
|         |                | Method2 | new_llh | 0.010665 | 4.70E-03 | 0.011174 | 1.11E-14 |
| MA33    | 3174           | Method1 | old_llh | 0.01488  | 2.65E-03 | 0.018411 | 5.16E-14 |
|         |                | Method1 | new_llh | 0.014835 | 2.66E-03 | 0.01837  | 7.02E-14 |
|         |                | Method2 | old_llh | 0.024161 | 5.09E-03 | 0.024423 | 1.21E-14 |
|         |                | Method2 | new_llh | 0.024087 | 5.10E-03 | 0.024387 | 4.42E-14 |

**Table S5. mtDNA contamination estimates and mtDNA haplogroups**

| Sample Name | Contamination<br>(Low-High) | MtDNA<br>haplogroup |
|-------------|-----------------------------|---------------------|
| MA32m       | 0.01 (0-0.02)               | H1b                 |
| MA33m       | 0.01 (0-0.02)               | H1b                 |

**Table S6. Y-chromosome derived SNPs defining the assigned hg.**

| SNP      | Haplogroup  | rs number   | Ypos37   | ancestral | derived | BelaIII | depth |
|----------|-------------|-------------|----------|-----------|---------|---------|-------|
| PF6014   | R           | rs1865680   | 6868118  | A         | G       | A       | 2     |
| P224     | R           | rs17307398  | 17285993 | C         | T       | T       | 4     |
| M734     | R           | rs1348733   | 18066156 | C         | T       | T       | 9     |
| P285     | R           | rs17249974  | 19267344 | C         | A       | A       | 2     |
| P227     | R           | rs4481791   | 21409706 | G         | C       | C       | 3     |
| P280     | R           | rs891407    | 21843090 | C         | G       | G       | 1     |
| P294     | R1          | rs1005041   | 7570822  | G         | C       | C       | 4     |
| P242     | R1          | rs7067478   | 7647357  | G         | A       | A       | 2     |
| P238     | R1          | rs9785717   | 7771131  | G         | A       | A       | 4     |
| P231     | R1          | rs9786465   | 9989615  | A         | G       | G       | 2     |
| P225     | R1          | rs17307070  | 15590342 | G         | T       | T       | 1     |
| P286     | R1          | rs1118473   | 17716251 | C         | T       | T       | 3     |
| P236     | R1          | rs9785959   | 17782178 | C         | G       | G       | 10    |
| P233     | R1          | rs9786232   | 21166358 | T         | G       | G       | 2     |
| M306     | R1          | rs1558843   | 22750583 | C         | A       | A       | 2     |
| L145     | R1a         | rs17306692  | 14138745 | C         | A       | A       | 4     |
| L62      | R1a         | rs17222573  | 17891241 | A         | G       | G       | 16    |
| L146     | R1a         | rs17250535  | 23473201 | T         | A       | A       | 2     |
| Page65.2 | R1a1        | rs2534636   | 2657176  | C         | T       | T       | 2     |
| M459     | R1a1        | rs17316227  | 6906074  | A         | G       | G       | 7     |
| M515     | R1a1a       | rs17221601  | 14054623 | T         | A       | A       | 3     |
| L168     | R1a1a       |             | 16202177 | A         | G       | A       | 1     |
| M512     | R1a1a       | rs17222146  | 16315153 | C         | T       | T       | 2     |
| M514     | R1a1a       | rs17315926  | 19375294 | C         | T       | T       | 1     |
| L449     | R1a1a       |             | 22966756 | C         | T       | T       | 6     |
| M417     | R1a1a1      | rs17316771  | 8533735  | G         | A       | A       | 1     |
| Page7    | R1a1a1      | rs34297606  | 14498990 | C         | T       | T       | 1     |
| S441     | R1a1a1b     | rs112284571 | 7683058  | G         | A       | A       | 1     |
| S224     | R1a1a1b     | rs111731595 | 8245045  | C         | T       | T       | 1     |
| M746     | R1a1a1b2    |             | 18985344 | C         | A       | A       | 5     |
| Z95      | R1a1a1b2a   |             | 23956870 | C         | T       | T       | 3     |
| Z2123    | R1a1a1b2a2a |             | 16453077 | C         | T       | T       | 3     |

**Table S7.  $f_4$ -statistics results.**

| Worldwide | Outgroup | BelaIII | Hungarian/Croatian | $f_4$  | Z     | SNPs   |
|-----------|----------|---------|--------------------|--------|-------|--------|
| Yoruba    | Mbuti    | BelaIII | Croatian           | 0.0004 | 0.229 | 543701 |
| Han       | Mbuti    | BelaIII | Croatian           | 0.0056 | 1.872 | 543701 |
| Papuan    | Mbuti    | BelaIII | Croatian           | 0.0072 | 2.194 | 543701 |
| Karitiana | Mbuti    | BelaIII | Croatian           | 0.0031 | 0.814 | 543701 |
| Eskimo    | Mbuti    | BelaIII | Croatian           | 0.0047 | 1.445 | 543701 |
| Uzbek     | Mbuti    | BelaIII | Croatian           | 0.0022 | 0.891 | 543701 |
| Ami       | Mbuti    | BelaIII | Croatian           | 0.0064 | 1.989 | 543701 |
| Selkup    | Mbuti    | BelaIII | Croatian           | 0.0051 | 1.78  | 543701 |
| Kalash    | Mbuti    | BelaIII | Croatian           | 0.0032 | 1.176 | 543701 |
| Iranian   | Mbuti    | BelaIII | Croatian           | 0.0009 | 0.383 | 543701 |
| BedouinB  | Mbuti    | BelaIII | Croatian           | 0.0003 | 0.124 | 543701 |
| Sardinian | Mbuti    | BelaIII | Croatian           | 0.0004 | 0.154 | 543701 |
| Adygei    | Mbuti    | BelaIII | Croatian           | 0.002  | 0.807 | 543701 |
| Russian   | Mbuti    | BelaIII | Croatian           | 0.0023 | 0.893 | 543701 |
| Druze     | Mbuti    | BelaIII | Croatian           | 0.0001 | 0.045 | 543701 |
| Yoruba    | Mbuti    | BelaIII | Hungarian          | 0.0015 | 0.863 | 543701 |
| Han       | Mbuti    | BelaIII | Hungarian          | 0.0038 | 1.264 | 543701 |
| Papuan    | Mbuti    | BelaIII | Hungarian          | 0.0066 | 2.037 | 543701 |
| Karitiana | Mbuti    | BelaIII | Hungarian          | 0.001  | 0.262 | 543701 |
| Eskimo    | Mbuti    | BelaIII | Hungarian          | 0.0032 | 1.003 | 543701 |
| Uzbek     | Mbuti    | BelaIII | Hungarian          | 0.0015 | 0.595 | 543701 |
| Ami       | Mbuti    | BelaIII | Hungarian          | 0.0046 | 1.431 | 543701 |
| Selkup    | Mbuti    | BelaIII | Hungarian          | 0.0036 | 1.265 | 543701 |
| Kalash    | Mbuti    | BelaIII | Hungarian          | 0.0029 | 1.099 | 543701 |
| Iranian   | Mbuti    | BelaIII | Hungarian          | 0.0023 | 0.962 | 543701 |
| BedouinB  | Mbuti    | BelaIII | Hungarian          | 0.0026 | 1.035 | 543701 |
| Sardinian | Mbuti    | BelaIII | Hungarian          | 0.0017 | 0.666 | 543701 |
| Adygei    | Mbuti    | BelaIII | Hungarian          | 0.0028 | 1.131 | 543701 |
| Russian   | Mbuti    | BelaIII | Hungarian          | 0.0019 | 0.758 | 543701 |
| Druze     | Mbuti    | BelaIII | Hungarian          | 0.0021 | 0.851 | 543701 |

**Table S8. Number of independent DNA fragments overlapping five phenotype-related SNPs with the frequency of the respective derived allele.**

|          | SNP       | LCT<br>rs4988235 | SLC45A2<br>rs16891982 | SLC24A5<br>rs1426654 | EDAR<br>rs3827760 | HERC2<br>rs12913832 |
|----------|-----------|------------------|-----------------------|----------------------|-------------------|---------------------|
|          | Ancestral | G                | C                     | G                    | A                 | A                   |
|          | Derived   | A                | G                     | A                    | G                 | G                   |
| Bela III | Coverage  | 8                | 24                    | 5                    | 11                | 7                   |
|          | Derived   | 75%              | 100%                  | 100%                 | 0%                | 28.6%               |



**Table S9. The sample details of laboratory procedures.**

| <b>Anatomical Element</b> | <b>Lab ID</b> | <b>amount of bone powder (mg)</b> | <b>Extract</b> | <b>Shotgun library (ds_noUDG)</b> | <b>mtDNA captured library (ds_noUDG)</b> | <b>390K captured library (ds_noUDG)</b> | <b>1240K captured library (ss_halfUDG)</b> |
|---------------------------|---------------|-----------------------------------|----------------|-----------------------------------|------------------------------------------|-----------------------------------------|--------------------------------------------|
| Femur                     | JK2069        | 111                               | MX27           | MA30s                             | -                                        | -                                       | -                                          |
| Vertebra                  | JK2070        | 92                                | MX28           | MA31s                             | -                                        | -                                       | -                                          |
| Metatarsal                | JK2071        | 107                               | MX29           | MA32s                             | MA32m                                    | MA32snp                                 | MA172snp                                   |
| Tarsal                    | JK2072        | 97                                | MX30           | MA33s                             | MA33m                                    | MA33snp                                 | MA173snp                                   |
